# Supplementary material
Source: Springer Nature journal article supplement (https://www.springermedizin.de/resource/supplementary/12955_2012_957_MOESM2_ESM.pdf/9558840)
Supplement: MOESM2 [file 9558840]

Distribution of patients according to the fracture site

| <u>Fracture site</u> | <u>Number of patients (%)</u> |
|----------------------|-------------------------------|
| L1                   | 25 (24.04)                    |
| L2                   | 11 (10.58)                    |
| L3                   | 6 (5.77)                      |
| L4                   | 10 (9.62)                     |
| L5                   | 4 (3.85)                      |
| T5                   | 1 (0.96)                      |
| T6                   | 2 (1.92)                      |
| T7                   | 8 (7.69)                      |
| T8                   | 8 (7.69)                      |
| T9                   | 6 (5.77)                      |
| T10                  | 2 (1.92)                      |
| T11                  | 9 (8.65)                      |
| T12                  | 12 (11.54)                    |
